# Supplementary material for: High photodegradation and antibacterial activity of BN–Ag/TiO2 composite nanofibers under visible light
Source: Royal Society of Chemistry journal article supplement (doi:10.1039/c7nj03183a), 2017-12-18
Supplement: c7nj03183a1.pdf [file c7nj03183a1.pdf]

**Electronic Supplementary Information**

Journal: New journal of chemistry

**High Photodegradation and Antibacterial Activity of BN-Ag/TiO<sub>2</sub>  
Composite Nanofibers Under Visible Light**

Maryline Nasr,<sup>1,2</sup> Laurence Soussan,<sup>1</sup> Roman Viter,<sup>3</sup> Cynthia Eid,<sup>2</sup> Roland Habchi,<sup>2</sup> Philippe Miele<sup>1,4</sup> and Mikhael Bechelany\*<sup>1</sup>

<sup>1</sup>Institut Européen des Membranes IEM, UMR-5635, Université de Montpellier, ENSCM, CNRS, Place Eugène Bataillon, F-34095 Montpellier Cedex 5, France

<sup>2</sup>EC2M, Faculty of Sciences 2, campus Pierre Gemayel, Fanar, Lebanese University, 90239 Lebanon

<sup>3</sup>Institute of Atomic Physics and Spectroscopy, University of Latvia, 19 Raina Blvd., LV 1586 Riga, Latvia

<sup>4</sup>Institut Universitaire de France (IUF)

\* Corresponding author: [mikhael.bechelany@umontpellier.fr](mailto:mikhael.bechelany@umontpellier.fr), Phone: +33467149167, Fax: +33467149119

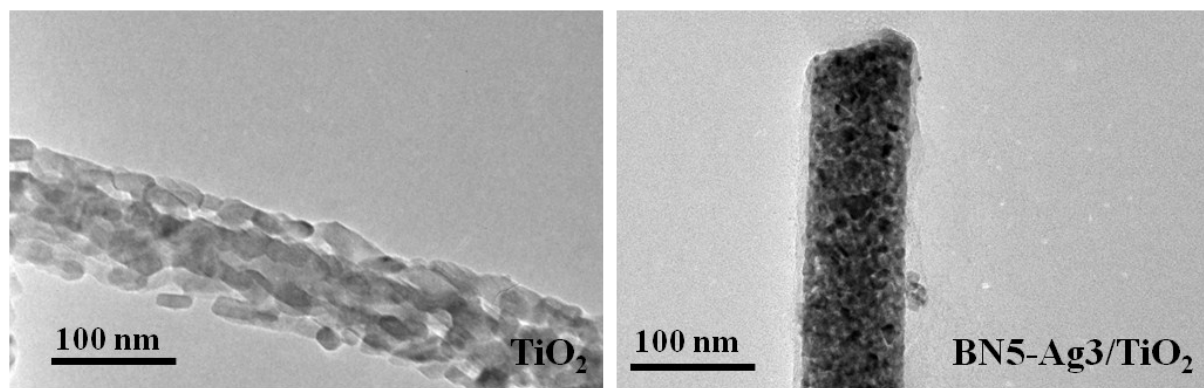

**Figure S1.** Transmission electron microscopy images of TiO<sub>2</sub> nanofibers and BN5-Ag<sub>3</sub>/TiO<sub>2</sub> annealed composite nanofibers under air for 4h at 500°C.

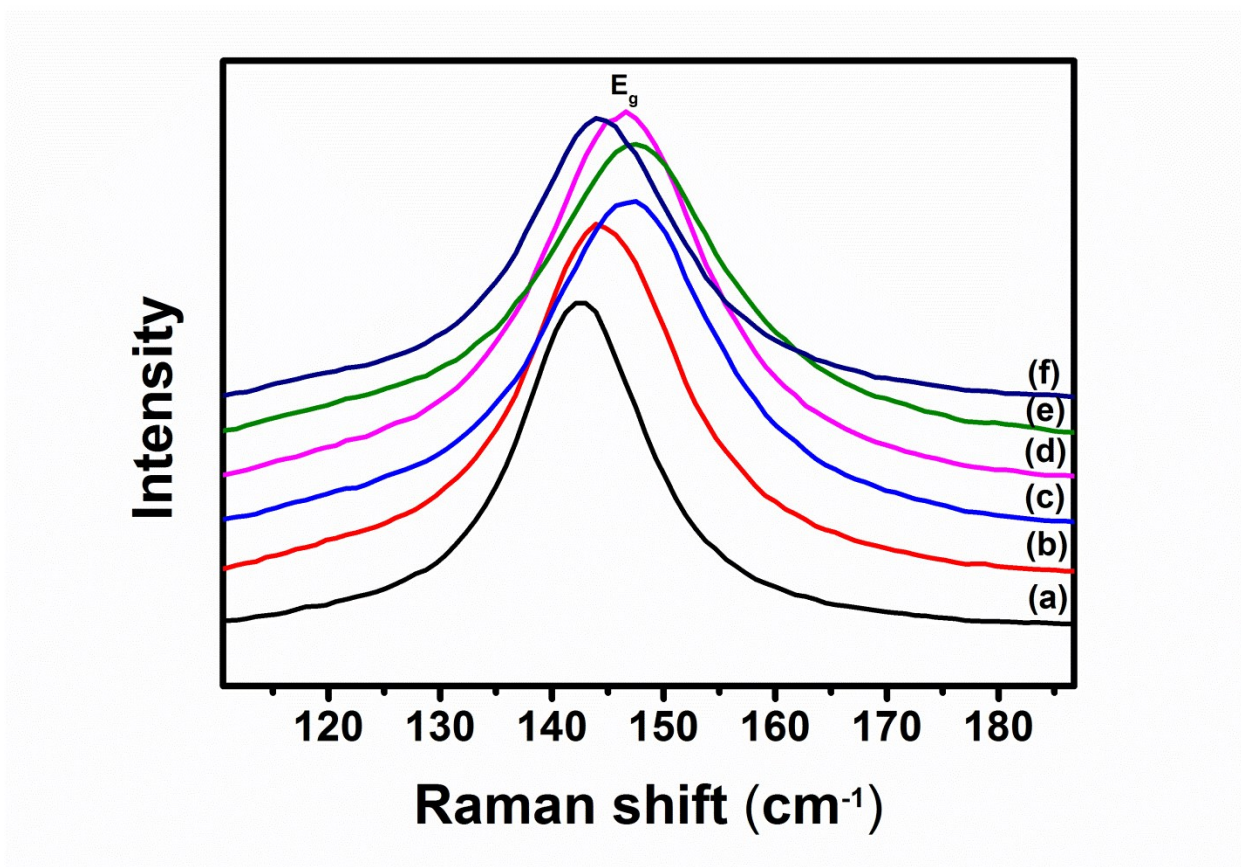

**Figure S2.** Raman Shift of a) TiO<sub>2</sub>, (b) Ag<sub>0.5</sub>/TiO<sub>2</sub>, (c) Ag<sub>1.5</sub>/TiO<sub>2</sub>, (d) Ag<sub>3</sub>/TiO<sub>2</sub>, (e) BN<sub>3</sub>-Ag<sub>3</sub>/TiO<sub>2</sub> and (f) BN<sub>5</sub>-Ag<sub>3</sub>/TiO<sub>2</sub> annealed composite nanofibers in air for 4h at 500°C

**Table S1.** Comparison of the photocatalytic activity of different Ag/TiO<sub>2</sub> nanocomposites

| Photocatalysts                                      | Photocatalyst concentration in dye solution (g/L) | Irradiation light source | Time (min) | Degradation efficiency (%) | Ref.      |
|-----------------------------------------------------|---------------------------------------------------|--------------------------|------------|----------------------------|-----------|
| Ag(NPs) /TiO <sub>2</sub> -P25 composite            | 0.5                                               | Visible (125 W)          | 180        | 86                         | 55        |
| Ag/TiO <sub>2</sub> nanocomposites                  | –                                                 | Visible (500 W)          | 360        | 80                         | 56        |
| Ag/TiO <sub>2</sub> Composite NFs                   | 0.1                                               | UV (1000 W)              | 20         | 100                        | 14        |
| Ag/TiO <sub>2</sub> nanowires                       | 0.6                                               | UV (150 W)               | 80         | 100                        | 18        |
| Ag/TiO <sub>2</sub> nanotubes                       | 1                                                 | Visible (500 W)          | 240        | 100                        | 54        |
| Ag(NPs)/TiO <sub>2</sub> nanofibers                 | 1                                                 | UV (125 W)               | 60         | 98                         | 53        |
| Ag(NPs)/TiO <sub>2</sub> nanofibers                 | 1                                                 | Visible (150 W)          | 120        | 54                         | 53        |
| Ag-AgBr(NPs)/TiO <sub>2</sub> nanofibers            | 1                                                 | Visible (150 W)          | 300        | 92                         | 47        |
| BN5-Ag <sub>3</sub> /TiO <sub>2</sub> composite NFs | 0.4                                               | Visible (150 W)          | 80         | 98                         | This work |
